# Supplementary material
Source: HighWire-hosted journal article supplement (doi:10.1101/rna.030999.111)
Supplement: Supp_Fig_Legends.docx [file Supp_Fig_Legends.docx]

**Supplementary Figure S1**

(**A**) Cleavage kinetics for the wild type (red circles) and pyC modified *S. mansoni* ribozymes at position 7 - pyC7 (black circles); 3 – pyC3 (open circles); 1.1 – pyC1.1 (open diamonds); 1.9 – pyC1.9 (closed diamonds). For clarity, the cleavage curves were slightly incremented from each other and the red line representing fit to the wild type cleavage was projected in front. The reactions were performed under conditions of 50 mM Tris pH 7.0, 100 mM NaCl and 10 mM MgCl2. The rate constant for the wild type ribozyme k*c* = 30 min-1 (±5) did not differ significantly from those obtained for the fluorescence modified ribozymes: pyC7 - k*c* = 31 min-1 (±6); pyC3 - k*c* = 30 min-1 (±6); pyC1.1 - k*c* = 33 min-1 (±4); pyC1.9 - k*c* = 35 min-1 (±4). (**B**) Cleavage activity of the wild type ribozyme (closed circles) versus pyC7 substitution (open circles) at four different pHs: 5.5 (red); 6.5 (green); 7.5 (turquoise); 8.5 (blue). The difference between the wild type and pyC7 ribozyme cleavage rate at different pHs did not exceed 5%, and the data for the pyC7 hammerhead ribozyme are summarized in the Table 1. (**C**) Comparison of cleavage activity at pH 7 of the wild type (closed symbols) versus pyC7 (open symbols) modified *S. mansoni* hammerhead ribozyme and its G8-C3 base pair Watson-Crick analogues: G8-C3 (circles); I8-C3 (squares); A8-U3 (triangles); diAP8-U3 (diamonds). The differences of the cleavage activity between modified and unmodified ribozymes and variants did not exceed 5% at pH 7 and other pHs (data not shown). The apparent rates constant for the pyC7 ribozymes are summarized in Table 1. (**D**) Comparison of cleavage activity at pH 7 of the wild type (closed symbols) versus pyC7 (open symbols) modified *S. mansoni* hammerhead ribozyme and its G8-C3 base pair wobble-like analogues: G8-C3 (circles); G8-U3 (grey squares); A8-C3 (grey triangles); diAP8-C3 (grey diamonds). The differences of the cleavage activity between modified and unmodified ribozymes and its G8-C3 variants did not exceed 5% at pH 7 and other pHs (data not shown) and the apparent rates constant for the pyC7 ribozymes are summarized in Table 1.

**Supplementary Figure S2**

Structural arrangement of hammerhead ribozyme residues: (**A**) C1.9 and (**B**) C3 and C7 in the ground and active state, respectively. The arrangement of ground and active state was based on 1MME and 2GOZ crystal structures.

**Supplementary Figure S3**

**(A)** Scheme of the single hydrogen bond C17 – C3 wobble-like base pair interaction observed in the crystal structure of the minimal hammerhead ribozyme (Scott et al., 1996). The single hydrogen bond between the N6 of C17 and N3 of C3 is highlighted by the grey dashed line. Site-specific N3 protonation of C17 leads to formation of a hydrogen bond to O6 of C3, thereby transforming the base pair to a more stable conformation which is thermodynamically equivalent to a G-U wobble (Masquida & Westhof, 2000). (**B**) Scheme of the Watson-Crick-like double hydrogen bond C17-U3 interaction. Protonation of C17 at N3 position leads to a distortion of the interaction as indicated by a black cross.

**Supplementary Figure S4**

Modifications to ribozymes that inhibit catalytic activity may do so by inhibiting folding to the native tertiary structure or by inhibiting a step that follows tertiary structure formation. To confirm the fluorescence folding analysis we employed native gel electrophoresis. Native gel electrophoresis does not approach the spatial resolution of the footprinting technique, but can resolve distinct tertiary folds, especially those that differ in the disposition of RNA molecules around helical junctions. This latter analysis is particularly informative in the hammerhead ribozyme, where docking of the two domains of the ribozyme has been shown to be an essential step in the formation of the active complex (Bassi et al., 1995). Native gel electrophoresis of hammerhead ribozyme fluorescence and G8-C3 variants in the presence of 10mM Mg2+ **(A)** and absence of Mg2+ **(B)**.Lane 1 for each condition shows mobility of substrate strand alone. Docked complex migrates faster than substrate strand alone. Complexes were pre-assembled as described in Material and Methods and run on a 10% nondenaturing gel in the adequate buffer for 18 h at 4°C.
